# Supplementary material for: Structural and molecular basis of interaction of HCV non-structural protein 5A with human casein kinase 1α and PKR
Source: PubMed Central journal article supplement (PMC3534215; doi:10.1186/1472-6807-12-28), 2012-11-13
Supplement: 1472-6807-12-28-S2.pdf [file 1472-6807-12-28-S2.pdf]

(2a)

ISDR

D902081b PSLKATCTTHHDS PDADLIEANLLWRQEMGGNITRVESENKVVILDSFDPIRAVEDEEREISVPAEI  
AB1913331b PSLKATCTTHHDS PDADLIEANLLWRQEMGGNITRVESENKVVILDSFDPLRAEEDEREVSVP AEI  
AF4832691b PSLKATCTTHHDS PDADLIEANLLWRQEMGGNITRVESENKVVILDSFDPLRAEEDEREVSVP AEI  
EU1553311b PSLKATCTTRHDS PDADLIEANLLWRQEMGGNITRVESENKVVILDSFDPLRAEEDEREISVPAEI  
EF4074981b PSLKATCTTHHDS PDADLIEANLLWRQEMGGNITRVESENKVVILDSFDPLRAEEDEREVSVP AEI  
U454761b PSLKATCTTRHDS PDADLIEAHLWRQEMGGNITRVESENKVVILDSFDPLRAEEDEREVSVP AEI  
D144841b PSLKATCTIHHDS PDADLIEANLLWRQEMGGNITRVESENKVVILDSFEPIRAEEDEREVSVP AEI  
AF2077621b PSLKATCTTRHDS PDVDLIEANLLWRQEMGGNITRVESENKVVILDSFEPLRAEEDEREPSVP AEI  
AF034151 PSLKATCTTRHDS PDADLIEANLLWRQEMGGNITRVESENKVVILDSFDPLHAEEDEREKVSVP AEI

HCV\_3a\_NZL1 PSLKATCQTHRPH PDAELVDANLLWRQEMGSGNITRVESETKVVVILDSFEPLRAETDDELVEPSVAAEC  
NR10\_3a PSLKATCQTHRPH PDAELVDANLLWRQEMGSGNITRVESETKVVVILDSFEPLRAETDDELVEPSVAAEC  
NR2\_3a PSLKATCQTHRPH PDAELVDANLLWRQEMGSGNITRVESETKVVVILDSFEPLRAETDDELVEPSVAAEC  
NR4\_3a PSLKATCQTHRPH PDAELVDANLLWRQEMGSGNITRVESETKVVVILDSFEPLRAETDDELVEPSVAAEC  
NR6\_3a PSLKATCQTHRPH PDAELVDANLLWRQEMGSGNITRVESETKVVVILDSFEPLRAETDDELVEPSVAAEC  
NR3\_3a PSLKATCQTHRPH PDAELVDANLLWRQEMGSGNITRVESETKVVVILDSFEPLRAETDDELVEPSVAAEC  
DQ4308203a PSLKATCQTHRPH PDVELVDANLLWRQEMGSGNITRVESETKVVVILDSFEPLRAETDDELVEPSVAAEC  
AY9564673a PSLKATCQTHRPH PDAELVDANLLWRQEMGSGNITRVESETKVVVILDSFEPLRAETDDELVEPSVAAEC  
GQ3562023a PSLKATCQTHRPH PDAELVDANLLWRQEMGSGNITRVESETKVVVILDSFEPLRAETDDELVEPSVAAEC  
GQ3562013a PSLKATCQTHRPH PDAELVDANLLWRQEMGSGNITRVESETKVVVILDSFEPLRAETDDELVEPSVAAEC  
DQ4375093a LSLKATCQTHSPY PDAELVDANLLWRQEMGSGNITRVESETKVVVILDSFEPLRAETDDELVEPSVAAEC  
GQ3562123a PSLKATCQTHRPH PDAELVDANLLWRQEMGSGNITRVESETEVVVILDSFEPLRAETDDELVEPSVAAEC  
GQ3562133a PSLKATCQTHRPH PDAELVDANLLWRQEMGSGNITRVESETKVVVILDSFEPLRAETDDELVEPSVAAEC

V3 REGION

D902081b GS-----SGSSAVDSGTATGPPDQASDDGDKG  
AB1913331b GS-----SGSSAVDSGTATAPPDQPSDDGDAG  
AF4832691b GS-----SGSSAVDSGTATAPPDQSPDDGDAG  
EU1553311b GS-----SESSAVDSGTATAPPDQPSDNGDTG  
EF4074981b GS-----SESSAVDSGTATAPPDQALDDGDKG  
U454761b GS-----SESSAVDSGTATAPPQSSDDVDTG  
D144841b GG-----SGSSAADSGTATAPPDQTSDDGDKE  
AF2077621b GS-----SGSSAVDSGTATAPPDQASNDGDKE  
AF034151 GS-----SGSSAVDSGTASAPPDQSTDNGDTG

HCV\_3a\_NZL1 PSSKPQEENSSSSGVDTQSSSTSKVFPSPGGE--  
NR10\_3a SSSEPQEENSSSSGVDTQSSSTSKVFPSPGGE--  
NR2\_3a PSSKPQEENSSSSGVDTQSSSTSKVFPSPGGE--  
NR4\_3a PSSKPQEENSSSSGVDTQSSSTSKVFPSPGGE--  
NR6\_3a PSPKPQEENSSSSGVDTQSSSTSRVFPSPAGE--  
NR3\_3a PSPKPQEENSSSSGVDTQSSSTSRVFPSPAGE--  
DQ4308203a PSSEPQGENSSSSGVDTQSSSTASKVFPSSGGE--  
AY9564673a SSSKPQEEDSSSSGVDTQSSSTSKVFPPEEE--  
GQ3562023a PSAKSQEESSSSGVTQSSSTAPKVFPSEEE--  
GQ3562013a PPKKPQEENSSSSGVDTQSSSTSKAFPSFREE--  
DQ4375093a PSSLQEEENSSSSGVDTQPSSTSNVFPSPGGE--  
GQ3562123a PSSLQEKDSSSSGVDQSSSTSKVFPSSRGE--  
GQ3562133a PSSKPQEETSSSSGVDTQSSSTSKAFPSPEGE--

(2b)

ISDR

D90208 PSLKATCTTHHDSPDADLIEANLLWRQEMGGNITRVESENKVVILDSFDPIRAVEDEEREISVPAEI  
AB1913331b PSLKATCTTHHDSPDADLIEANLLWRQEMGGNITRVESENKVVILDSFDPLRAEEDEREVSVPAEI  
AF4832691b PSLKATCTTHHDSPDADLIEANLLWRQEMGGNITRVESENKVVILDSFDPLRAEEDEREVSVPAEI  
EU1553311b PSLKATCTTRHDSPDADLIEANLLWRQEMGGNITRVESENKVVILDSFDPLRAEEDEREISVPAEI  
EF4074981b PSLKATCTTHHDSPDADLIEANLLWRQEMGGNITRVESENKVVILDSFDPLRAEEDEREVSVPAEI  
U454761b PSLKATCTTRHDSPDADLIEAHLWRQEMGGNITRVESENKVVILDSFDPLRAEEDEREVSVPAEI  
D144841b PSLKATCTIHHDSPDADLIEANLLWRQEMGGNITRVESENKVVILDSFEPIRAEEDEREVSVPAEI  
AF2077621b PSLKATCTTRHDSPDVDLIEANLLWRQEMGGNITRVESENKVVILDSFEPLRAEEDEREPSVPAEI  
AF034151 PSLKATCTTRHDSPDADLIEANLLWRQEMGGNITRVESENKVVILDSFDPLHAEEDEREVSVPAEI

AB0476392a PSLRATCTTHSNTYDVMVDANLL----MEGGVAQTEPESRVPVLDLFLEPMAEEESDLEPSIPSEC  
D009442a PSLRATCTTHGKAYDVMVDANLF----MGGDVTRIESESKVVVLDLSDPMVEERSDLEPSIPSEY  
HCV\_2a PSLRATCTTHGKAYDVMVDANLF----MGGDVTRIESESKVVVLDLSDPMVEERSDLEPSIPSEY  
AB0476412a PSLRATCTTHGKTHDVMVDANLF----MGGDVTRIESESKVVVLDLSDPMVEEEGDLEPSIPSEY  
AF1690022a PSLRATCATHGKTYDVMVDANLF----MGGDVTRIESESKVVVLDLSDPMAEERSDLEPSIPSEY  
AF2384852a PSLRATCTTHGKTYDVMVDANLF----MGGDVTRIESESKVVVLDLSDPMAEERSDLEPSIPSEY  
AB0476432a VSLRATCATHGEAYDVMVDANLF----MRGEVTRIESESKVVI LDYLDPMTAEEESDLEPSIPSEY  
AY7464602a PSLRATCTTYGRAHDVMVDANLF----MGGGEVWIESESKVVVLDLSDSMAEEKSDLEPSIPSEY

V3 REGION

D90208 G-----SSGSSAVDSGTATGPPDQASDDGDKG  
AB1913331b G-----SSGSSAVDSGTATAPPDGPSSDDGDAG  
AF4832691b G-----SSGSSAVDSGTATAPPDQSPDDGDAG  
EU1553311b G-----SSESSAVDSGTATAPPDQPSDNGDTG  
EF4074981b G-----SSESSAVDSGTATIPPDQALDDGDKG  
U454761b G-----SSESSAVDSGTATAPPQSSDDVDTG  
D144841b G-----GSGSSAADSGTATAPPDQTSDDGDKE  
AF2077621b G-----SSGSSAVDSGTATAPPDQASNDGDKE  
AF034151 G-----SSGSSAVDSGTASAPPDQSTDNGDTG

AB0476392a GQPPSSGDAGSSTGAGAAESGGPT--SPGEP----AP  
D009442a GQPPPSGDSGLSTGADAADSGSRT--PPDEL----AL  
HCV\_2a GQPPPSGDSGLSTGADAADSGSRT--PPDEL----AL  
AB0476412a GQPPPSGDSGLSTGADAADSGSRT--PPDES----AL  
AF1690022a GQPPPSGDSGLSTGADAADSGGQA--SPDEL----AL  
AF2384852a GQPPPSGDSGLSTGADAADSGGRT--PPDEL----AL  
AB0476432a GQAPPSGESGLSTGADAADSGGRT--PPDES----AL  
AY7464602a GQPPPSGNSGLSTGADAAGSGGRT--PPDEL----AL

(2c) ISDR

D90208 PSLKATCTTHHDSFDADLIEANLLWRQEMGGNITRVESENKVVILDSFDPIRAVEDEREISVPAEI  
AB1913331b PSLKATCTTHHDSFDADLIEANLLWRQEMGGNITRVESENKVVILDSFDPLRAEEDEREVSVP AEI  
AF4832691b PSLKATCTTHHDSFDADLIEANLLWRQEMGGNITRVESENKVVILDSFDPLRAEEDEREVSVP AEI  
EU1553311b PSLKATCTTRHDSFDADLIEANLLWRQEMGGNITRVESENKVVILDSFDPLRAEEDEREISVPAEI  
EF4074981b PSLKATCTTHHDSFDADLIEANLLWRQEMGGNITRVESENKVVILDSFDPLRAEEDDREVSVP AEI  
U454761b PSLKATCTTRHDSFDADLIEAHLWRQEMGGNITRVESENKVVILDSFDPLRAEEDEREVSVP AEI  
D144841b PSLKATCTIHHDSFDADLIEANLLWRQEMGGNITRVESENKVVILDSFEPIRAEEDEREVSVP AEI  
AF2077621b PSLKATCTTRHDSFDVDLIEANLLWRQEMGGNITRVESENKVVILDSFEPLRAEEDEREPSVPAEI  
AF034151 PSLKATCTTRHDSFDADLIEANLLWRQEMGGNITRVESENKVVILDSFDPLHAEEDKEVSVPAEI

GQ3562133a PSLKATCQTHRPHDAELVDANLLWRQEMGSNITRVESETKVVILDSFEPLRAETDDNELSVA AEC  
HCV\_3a\_NZL1 PSLKATCQTHRPHDAELVDANLLWRQEMGSNITRVESETKVVILDSFEPLRAETDDVEPSV A AEC  
NR10\_3a PSLKATCQTHRPHDAELVDANLLWRQEMGSNITRVESETKVVILDSFEPLRAETDDAELSVA AEC  
NR2\_3a PSLKATCQTHRPHDAELVDANLLWRQEMGSNITRVESETKVVILDSFEPLRAETDDAELSVA AEC  
NR4\_3a PSLKATCQTHRPHDAELVDANLLWRQEMGSNITRVESETKVVILDSFEPLRAETDDDELSVA AEC  
NR6\_3a PSLKATCQTHRPHDAELVDANLLWRQEMGSNITRVESETKVVILDSFEPLKAENDDVELSVA AEC  
NR3\_3a PSLKATCQTHRPHDAELVDANLLWRQEMGSNITRVESETKVVILDSFEPLRAETDDVELSVA AEC  
DQ4308203a PSLKATCQTHRPHDVELVDANLLWRQEMGSNITRVESETKVVILDSFEPLRAEPDDIELSVA AEC  
AY9564673a PSLKATCQTHRPHDAELVDANLLWRQEMGSNITRVESETKVVILDSFEPLRAEPDDTELSVA AEC  
GQ3562023a PSLKATCQTHRPHDAELVDANLLWRQEMGSNITRVESETKVVILDSFEPLKAETDDTELSVA AEC  
GQ3562013a PSLKATCQTHRPHDAELVDANLLWRQEMGSNITRVESETKVVILDSFEPLRAETDDAELSVA AEC  
DQ4375093a LSLKATCQTHSPYPDAELVDANLLWRQEMGSNITRVESETKVVILDSFEPLRAETDDAELSVA AEC  
GQ3562123a PSLKATCQTHRPHDAELVDANLLWRQEMGSYITRLESETEVVILDSFEPLRAETDDTELSVTA EC  
AB0476392a PSLRATCTTHSNTYDVMVDANL----MEGGVAQTEPESRVPVLDLFLEPMAEESDLEPSIPSE C  
D009442a PSLRATCTTHGKAYDVMVDANLF----MGDVTRIESESKVVILDSLDPMVEERSDLEPSIPSE Y  
HCV\_2A PSLRATCTTHGKAYDVMVDANLF----MGDVTRIESESKVVILDSLDPMVEERSDLEPSIPSE Y  
AB0476412a PSLRATCTTHGKTHDVMVDANLF----MGDVTRIESESKVVILDSLDPMVEEGDLEPSIPSE Y  
AF1690022a PSLRATCATHGKTYDVMVDANLF----MGDVTRIESESKVVILDSLDPMAEERSDLEPSIPSE Y  
AF2384852a PSLRATCTTHGKTYDVMVDANLF----MGDVTRIESESKVVILDSLDPMAEERSDLEPSIPSE Y  
AB0476432a VSLRATCATHGEAYDVMVDANLF----MRGEVTRIESESKVVILDYLDPMTAESDLEPSIPSE Y  
AY7464602a PSLRATCTTYGRAHDVMVDANLF----MGGEVWIESESKVVILDSLDMAEESDLEPSIPSE Y

V3 REGION

D90208 GS-----SGSSAVDSGTATG---PPDQASDDGDKG  
AB1913331b GS-----SGSSAVDSGTATA---PPDGP SDDGDAG  
AF4832691b GS-----SGSSAVDSGTATA---PPDQSPDDGDAG  
EU1553311b GS-----SESSAVDSGTATA---PPDQPSDNGDTG  
EF4074981b GS-----SESSAVDSGTATI---PPDQALDDGDKG  
U454761b GS-----SESSAVDSGTATA---PPGQSSDDVDTG  
D144841b GG-----SGSSAADS GTATA---PPDQTSDDGDKE  
AF2077621b GS-----SGSSAVDSGTATA---PPDQASNDGDKE  
AF034151 GS-----SGSSAVDSGTASA---PPDQSTDN GDTG

GQ3562133a PSSKPQEETSSSSGVDTQSSTTSKAPPSPE----GE  
Hcv\_3a\_NZL1 PSSKPQEENSSSSGVDTQSSTTSKVPPSPG----GE  
NR10\_3a SSSEPKQEENSSSSGVDTQSSTTSKVPPSPG----GE  
NR2\_3a PSSKPQEENSSSSGVDTQSSTTSKVPPSPG----GE  
NR4\_3a PSSKPQEENSSSSGVDTQSSTTSKVPPSPG----GE  
NR6\_3a PSFKPKQEENSSSSGVDTQSSTTSRVPPSPA----GE  
NR3\_3a PSFKPKQEENSSSSGVDTQSSTTSRVPPSPA----GE  
DQ4308203a PSSEPKQENSSSSGVDTQSSTASKVPPSSG----GE  
AY9564673a SSSKPQEEDSSSSGVDTQSSTTSKVPPPPPE----EE  
GQ3562023a PSAKSQEESSSSSGVGTQSSTAPKVPPSSE----EE  
GQ3562013a PPPPKQEENSSSSGVDTQSSTTSKAPPSPR----EE  
DQ4375093a PSSKLQEENSSSSGVDTQPSTTSNVSPSPG----GE  
GQ3562123a PSSNLQEKDSSSSGVDAQSSTTSKVPPSSR----GE  
AB0476392a GQFPSSGDAGSSTGAGAAES-GGPTSPGEP----AP  
D009442a GQFPFSGD SGLSTGADAADS-GSRTPPDEL----AL  
HCV\_2a GQFPFSGD SGLSTGADAADS-GSRTPPDEL----AL  
AB0476412a GQFPFSGD SGLSTGADAADS-GSRTPPDES----AL  
AF1690022a GQFPFSGD SGLSTGADAADS-GGQASPDEL----AL  
AF2384852a GQFPFSGD SGLSTGADAADS-GGRTPPDEL----AL  
AB0476432a GQAPP SGE SGLSTGADAADS-GGRTPPDES----AL  
AY7464602a GQFPFSGN SGLSTGADAAGS-GGRTPPDEL----AL
